# Supplementary material
Source: PubMed Central journal article supplement (PMC3911122)
Supplement: JB.00960-13_zjb999092963so1.pdf [file JB.00960-13_zjb999092963so1.pdf]

**Table S1: List of oligonucleotides**

| Primer name   | Sequence                                | Purpose                      |
|---------------|-----------------------------------------|------------------------------|
| pSMU747FBam   | GACGGATCCAGCTCTAAACAAGGCTTCCAC          | SMU747 promoter cloning      |
| pSMU747REco   | GACGGAATTCCATAAAATCTATTTCTTGACTTTCTTGTC | SMU747 promoter cloning      |
| pSMU745FBam   | GACGGATCCAGTTCACAGACAATGCAACC           | SMU745 promoter/gene cloning |
| pSMU745REco   | GACGAATTCCATGTTTTCTTCTTCTTACTTCTC       | SMU745 promoter cloning      |
| SMU745REco    | GACGAATTCGCGGTGTGGTGCTTGCTATTC          | SMU745 gene                  |
| BglSMU745mutR | AAAAGATCTCATAGCAATTCCCGTACCAGC          | SMU745 mutagenesis           |
| BglSMU745mutF | AAAAGATCTGCCTTGGTATCTTCGCTTTATGG        | SMU745 mutagenesis           |
| BamSMU747F    | AAAGGATCCCTGATAATTTACCTAT               | SMU746-747 region cloning    |
| XhoSMU746R    | AAACTCGAGGATAAACGGTTGTAATC              | SMU746-7 region cloning      |
| XhoSMU747R    | AAACTCGAGGAGTGCATTTTAACT                | SMU747 gene cloning          |

**Table S2. Homologs of SMU.746 and SMU.747 found in GenBank database**

| SMU.746 | Description                                                                                                          | Coverage (%) | Max. identity (%) |
|---------|----------------------------------------------------------------------------------------------------------------------|--------------|-------------------|
| 1       | <i>Streptococcus mutans</i> LJ23, ABC superfamily ATP binding cassette transporter, binding protein                  | 100          | 99                |
| 2       | <i>Streptococcus mutans</i> GS-5, ABC superfamily ATP binding cassette transporter, binding protein                  | 100          | 99                |
| 3       | <i>Streptococcus rattii</i> FA-1, hypothetical protein SRA_02901                                                     | 100          | 88                |
| 4       | <i>Streptococcus macacae</i> NCTC 11558, TIGR03943 family protein                                                    | 100          | 83                |
| 5       | <i>Streptococcus bovis</i> ATCC 700338, ABC superfamily ATP binding cassette transporter, binding protein            | 100          | 73                |
| 6       | <i>Streptococcus pasteurianus</i> ATCC 43144, ABC superfamily ATP binding cassette transporter, binding protein      | 100          | 73                |
| 7       | <i>Streptococcus gallolyticus</i> UCN34, ABC superfamily ATP binding cassette transporter, substrate binding protein | 100          | 73                |

  

| SMU.747 | Description                                                                                                | Coverage (%) | Max. identity (%) |
|---------|------------------------------------------------------------------------------------------------------------|--------------|-------------------|
| 1       | <i>Streptococcus rattii</i> FA-1, putative permease                                                        | 99           | 91                |
| 2       | <i>Streptococcus macacae</i> NCTC 11558, putative permease                                                 | 99           | 87                |
| 3       | <i>Streptococcus infantarius</i> subsp. <i>infantarius</i> ATCC BAA-102, hypothetical protein STRINF_01897 | 99           | 77                |
| 4       | <i>Streptococcus pasteurianus</i> ATCC 43144, putative permease                                            | 99           | 78                |
| 5       | <i>Streptococcus macedonicus</i> ACA-DC 198, permease                                                      | 99           | 77                |
| 6       | <i>Streptococcus bovis</i> ATCC 700338, ABC superfamily ATP binding cassette transporter, membrane protein | 99           | 77                |
| 7       | <i>Streptococcus urinalis</i> 2285-97, putative permease                                                   | 99           | 77                |
